# Supplementary material
Source: PubMed Central journal article supplement (PMC8168340)
Supplement: mmc1.pdf [file mmc1.pdf]

## Supplemental Materials

### A. Fine-Grained Labels of our proposed dataset

We give fine-grained labels of each image in our dataset, which contains patient sex, patient age, and other detailed information. Table 10 shows a list of each labels with explanations where relevant.

Table 10: Fine-Grained Label

| Label                  | Description                                                                                                                                                                                                                   |
|------------------------|-------------------------------------------------------------------------------------------------------------------------------------------------------------------------------------------------------------------------------|
| patientid              | Internal identifier.                                                                                                                                                                                                          |
| offset                 | Number of days since the start of symptoms or hospitalization for each image or blank if unknown.                                                                                                                             |
| sex                    | Male (M), Female (F), or blank. Some patients are only given age period.                                                                                                                                                      |
| age                    | Age of the patient in years, or blank if unknown.                                                                                                                                                                             |
| finding                | Different types of pneumonia cause.                                                                                                                                                                                           |
| Label                  | Bacterial Pneumonia or Viral Pneumonia Bacterial Pneumonia.                                                                                                                                                                   |
| Detail_label           | Coronavirus Pneumonia or Influenza(H1N1) Pneumonia. Blank is only used for Bacterial Pneumonia.                                                                                                                               |
| Coarse_label           | COVID19 or Non-COVID19.                                                                                                                                                                                                       |
| survival               | Yes (Y) or no (N) or blank if unknown                                                                                                                                                                                         |
| intubated              | Yes (Y) if the patient was intubated (or ventilated) at any point during this illness or No (N) or blank if unknown.                                                                                                          |
| went_icu               | Yes (Y) if the patient was in the ICU (intensive care unit) or CCU (critical care unit) at any point during this illness or No (N) or blank if unknown.                                                                       |
| needed_supplemental_O2 | Yes (Y) if the patient required supplemental oxygen at any point during this illness or No (N) or blank if unknown.                                                                                                           |
| extubated              | Yes (Y) if the patient was successfully extubated or No (N) or blank if unknown.                                                                                                                                              |
| temperature            | Temperature of the patient in Celsius at the time of the image or blank if unknown.                                                                                                                                           |
| pO2_saturation         | partial pressure of oxygen saturation in % at the time of the image or blank if unknown.                                                                                                                                      |
| wbc_count              | white blood cell count in units of $10^3/\mu\text{L}$ at the time of the image or blank if unknown.                                                                                                                           |
| neutrophil_count       | neutrophil cell count in units of $10^3/\mu\text{L}$ at the time of the image or blank if unknown.                                                                                                                            |
| lymphocyte_count       | lymphocyte cell count in units of $10^3/\mu\text{L}$ at the time of the image or blank if unknown.                                                                                                                            |
| view                   | Posteroanterior (PA), Anteroposterior (AP), AP Supine (APS), or Lateral (L) for X-rays, blank means that we are not sure that image is Posteroanterior (PA), Anteroposterior (AP), but definitely not Lateral (L) for X-rays. |
| modality               | Axial for CT scans.                                                                                                                                                                                                           |
| filename               | CT or X-ray<br>Name with png extension                                                                                                                                                                                        |
